# Supplementary material for: Endoscopic Submucosal Dissection of Papillary Gastric Adenocarcinoma; Systematic Review
Source: MDPI journal article supplement (doi:10.3390/jcm9051465), 2020-05-14
Supplement: s1 [file s1]

Supplementary Table S1. Publication searching formula.

|                                   |                                                                                                                                        |
|-----------------------------------|----------------------------------------------------------------------------------------------------------------------------------------|
| <b>Database: PubMed-MEDLINE</b>   |                                                                                                                                        |
| #1                                | "early gastric cancer"[tiab] OR "gastric cancer"[tiab] OR "stomach neoplasms"[Mesh]: 109776                                            |
| #2                                | "Endoscopic submucosal dissection"[tiab] OR "ESD"[tiab] OR "Endoscopic resection"[tiab] OR "Endoscopic mucosal resection"[Mesh]: 10114 |
| #3                                | "surgical resection"[tiab] OR "gastrectomy"[Mesh]: 81074                                                                               |
| #4                                | #1 OR #2 OR #3: 181543                                                                                                                 |
| #5                                | "papillary"[tiab] OR "carcinoma, papillary"[Mesh] OR "adenocarcinoma, papillary"[Mesh]: 63352                                          |
| #6                                | #4 AND #5: 2010                                                                                                                        |
| <b>Database: Embase</b>           |                                                                                                                                        |
| #1                                | 'early gastric cancer':ab,ti,kw OR 'gastric cancer':ab,ti,kw OR 'stomach cancer'/exp: 137335                                           |
| #2                                | 'Endoscopic submucosal dissection':ab,ti,kw OR 'Endoscopic submucosal dissection'/exp OR 'Endoscopic mucosal resection'/exp: 13633     |
| #3                                | 'surgical resection':ab,ti,kw OR 'gastrectomy'/exp: 133928                                                                             |
| #4                                | #1 OR #2 OR #3: 258777                                                                                                                 |
| #5                                | 'papillary':ab,ti,kw OR 'papillary'/exp OR 'papillary carcinoma'/exp: 89247                                                            |
| #6                                | #4 AND #5: 3201                                                                                                                        |
| #7                                | #6 AND ([article]/lim OR [article in press]/lim OR [review]/lim): 1982                                                                 |
| <b>Database: Cochrane Library</b> |                                                                                                                                        |
| #1                                | early gastric cancer:ab,ti,kw or gastric cancer:ab,ti,kw: 7058                                                                         |
| #2                                | MeSH descriptor: [stomach neoplasms] explode all trees: 2376                                                                           |
| #3                                | Endoscopic submucosal dissection:ab,ti,kw or ESD:ab,ti,kw or Endoscopic resection:ab,ti,kw: 2744                                       |
| #4                                | MeSH descriptor: [endoscopic mucosal resection] explode all trees: 59                                                                  |
| #5                                | surgical resection:ab,ti,kw: 9444                                                                                                      |

- #6 MeSH descriptor: [gastrectomy] explode all trees: 956
- #7 #1 or #2 or #3 or #4 or #5 or #6: 18202
- #8 papillary:ab,ti,kw: 1569
- #9 MeSH descriptor: [carcinoma, papillary] explode all trees: 133
- #10 MeSH descriptor: [adenocarcinoma, papillary] explode all trees: 49
- #11 #8 or #9 or #10: 1569
- #12 #7 and #11: 81 (review 1, trial 80)

**Supplementary Table S2.** Histologic characteristics of the articles included in the systematic review.

| Included article                           | Size                                         | Invasion depth                                                                     | LVI                                                                                                                          | Perineural invasion | Histology of ESD specimen                                                                                                                       | LNM                                                                                                                                                                                                                                                                       |
|--------------------------------------------|----------------------------------------------|------------------------------------------------------------------------------------|------------------------------------------------------------------------------------------------------------------------------|---------------------|-------------------------------------------------------------------------------------------------------------------------------------------------|---------------------------------------------------------------------------------------------------------------------------------------------------------------------------------------------------------------------------------------------------------------------------|
| Lee HJ et al. (2015) [18]                  | Median 22 mm (range: 6–59)                   | Mucosa: 14/24 (m1, m2, m3: 0, 4, 10),<br>Submucosa: 10/24 (41.7%) (sm1, sm2: 4, 6) | 5/24 (20.8%) in ESD specimen                                                                                                 | -                   | Pure PAC: 13/24, Mixed papillary type with differentiated adenocarcinoma: 9/24, Mixed papillary type with undifferentiated adenocarcinoma: 2/24 | 9/49 (18.3%) in surgical specimen, 1/24 (4.2%) in ESD specimen                                                                                                                                                                                                            |
| Karpińska-Kaczmarczyk K et al. (2017) [19] | ≤10 mm: 5/13 (38.5%), > 10 mm: 8/13 (61.5%)  | T1a: 8/13, T1b: 5/13 (38.5%), submucosal invasion over 500 um: 3/13 (23.1%)        | -                                                                                                                            | -                   | -                                                                                                                                               | -                                                                                                                                                                                                                                                                         |
| Kim TS et al. (2019) [20]                  | 2.1 ± 1.2 mm, Median 18 (range: 2–52)        | Mucosa: 51/87, Submucosa: 36/87 (41.4%) (sm1: 12, sm2 or sm3: 24)                  | Lymphatic invasion: 22/87 (25.3%), venous invasion: 5/87 (5.7%) in ESD specimen                                              | -                   | Histologic heterogeneity: 14/87 (16.1%)                                                                                                         | -                                                                                                                                                                                                                                                                         |
| Park JH et al. (2019) [21]                 | ≤20 mm: 26/33 (78.8%), > 20 mm: 7/33 (21.2%) | Mucosa: 28/33, Submucosa: 5/33 (15.2%)                                             | 1/33 (3%) in ESD specimen                                                                                                    | -                   | -                                                                                                                                               | 13/52 (25%) in surgical specimen                                                                                                                                                                                                                                          |
| Yasuda K et al. (2000) [22]                | 52 ± 30 mm                                   | Serosal invasion: 9/65 (13.8%)                                                     | Lymphatic invasion: 19/65 (29%), venous invasion: 5/65 (8%)                                                                  | -                   | -                                                                                                                                               | 35/65 (54%), peritoneal dissemination: 3/65 (5%), liver metastasis: 9/65 (14%), stage III, IV: 24/65 (34%), curative operation: 56/65 (86%)<br>Among the 35 patients with node-positive differentiated submucosal cancers, PAC was not a significant risk factor for LNM. |
| Mita T et al. (2001) [23]                  | -                                            | -                                                                                  | -                                                                                                                            | -                   | -                                                                                                                                               | -                                                                                                                                                                                                                                                                         |
| Sekiguchi M et al. (2013) [24]             | -                                            | -                                                                                  | PAC component was a significant risk factor for lymphatic involvement in a multivariate analysis (OR: 8.1, 95% CI: 3.2–20.6) | -                   | -                                                                                                                                               | -                                                                                                                                                                                                                                                                         |
| Yamada T et al. (2014) [25]                | -                                            | -                                                                                  | Among 143 EGCs in absolute indication of                                                                                     | -                   | -                                                                                                                                               | -                                                                                                                                                                                                                                                                         |

|                                |                             |                                                                                     |                                                                                                                                                                                             |                                  |                                                                                                                                                  |                                                                                                                                                                                                   |                                                                                                                                                                                                                                                           |
|--------------------------------|-----------------------------|-------------------------------------------------------------------------------------|---------------------------------------------------------------------------------------------------------------------------------------------------------------------------------------------|----------------------------------|--------------------------------------------------------------------------------------------------------------------------------------------------|---------------------------------------------------------------------------------------------------------------------------------------------------------------------------------------------------|-----------------------------------------------------------------------------------------------------------------------------------------------------------------------------------------------------------------------------------------------------------|
| Sekiguchi M et al. (2015) [26] | -                           | -                                                                                   | ESD, 16 showed SM invasion or LVI. PAC or moderately differentiated adenocarcinoma was a significant risk factor for LVI or SM invasion in a multivariate analysis (OR: 11, 95% CI: 2.9–42) | -                                | -                                                                                                                                                | PAC component was a significant risk factor for lymphatic involvement in a multivariate analysis (OR: 3.1, 95% CI: 1.6–6.0), but the presence of a PAC was not a significant risk factor for LNM. | PAC was not a significant risk factor for LNM.                                                                                                                                                                                                            |
| Fang C et al. (2016) [28]      | -                           | -                                                                                   | -                                                                                                                                                                                           | -                                | -                                                                                                                                                | -                                                                                                                                                                                                 | Among the 58 surgically resected EGCs with PAC, 6/58 (10.3%) showed LNM (+). PAC was not a significant risk factor for LNM.                                                                                                                               |
| Lee HJ et al. (2017) [29]      | Median 30 mm (range: 9–105) | Mucosa: 16/56 (m1, m2, m3: 0, 1, 15),<br>Submucosa: 40/56 (71.4%) (sm1, sm2: 6, 34) | 16/56 (28.6%) in surgical specimen                                                                                                                                                          | 4/56 (7.1%) in surgical specimen | Pure PAC: 34/56, Mixed papillary type with differentiated adenocarcinoma: 14/56, Mixed papillary type with undifferentiated adenocarcinoma: 8/56 | 10/56 (17.9%) in surgical specimen                                                                                                                                                                | Among 123 patients who had gastrectomy with LN dissection due to presence of lymphatic invasion after ESD of EGCs, 7 (5.7%) showed LNM. PAC component was a significant risk factor for LNM in a multivariate analysis (OR: 552.5, 95% CI: 1.2–254871.81) |
| Park JW et al. (2017) [30]     | -                           | -                                                                                   | -                                                                                                                                                                                           | -                                | -                                                                                                                                                | -                                                                                                                                                                                                 | -                                                                                                                                                                                                                                                         |

|                           |                                                                                        |                                                                                   |                                                                                                                                                                                              |                                   |   |                                                                                                                                                                          |
|---------------------------|----------------------------------------------------------------------------------------|-----------------------------------------------------------------------------------|----------------------------------------------------------------------------------------------------------------------------------------------------------------------------------------------|-----------------------------------|---|--------------------------------------------------------------------------------------------------------------------------------------------------------------------------|
| Yu H et al. (2017) [10]   | <20 mm: 35/59 (59.3%), ≥ 20 mm: 24/59 (40.7%)                                          | Mucosa: 21/59 (m1, m2, m3: 0, 9, 12), Submucosa: 38/59 (64.4%) (sm1, sm2: 21, 17) | 10/59 (16.9%) in surgical specimen                                                                                                                                                           | 0% in surgical specimen           | - | 8/59 (13.6%) in surgical specimen                                                                                                                                        |
| Min BH et al. (2018) [31] | 3.0 ± 1.2 (in mucosa-confined lesion), 3.4 ± 1.6 (in lesions with submucosal invasion) | Mucosa: 66/130, Submucosa: 64/130 (49.2%) (sm1: 19, sm2: 25, sm3: 20)             | Lymphatic invasion: 34/130 (26.2%), venous invasion: 10/130 (7.7%) in surgical specimen. Lymphatic invasion was not different between WD/MD adenocarcinoma and PAC in a univariate analysis. | 3/130 (2.3%) in surgical specimen | - | Among 130 EGCs with PAC, 57 mucosal EGCs and 6 submucosal EGCs met the curative endoscopic resection criteria. None of these tumors showed LNM in the surgical specimen. |

EGC, early gastric cancer; PAC, papillary adenocarcinoma; ESD, endoscopic submucosal dissection; LVI, lymphovascular invasion; LNM, lymph node metastasis; OR, odds ratio; CI, confidence interval.

Supplementary Table S3. Risk of bias evaluation (ROBINS-I assessment tool).

| Study                                      | Risk of bias pre-intervention and at intervention domains |                                                  |                                         | Risk of bias post-intervention domains            |                          |                                 |                                          |          | Overall Assessment of bias |
|--------------------------------------------|-----------------------------------------------------------|--------------------------------------------------|-----------------------------------------|---------------------------------------------------|--------------------------|---------------------------------|------------------------------------------|----------|----------------------------|
|                                            | Bias due to Confounding                                   | Bias in selection of participants into the study | Bias in classification of interventions | Bias due to deviations from intended intervention | Bias due to missing data | Bias in measurement of outcomes | Bias in selection of the reported result |          |                            |
| Lee HJ et al. (2015) [18]                  | Low                                                       | Low                                              | Low                                     | Low                                               | Low                      | Low                             | Low                                      | Low      |                            |
| Karpińska-Kaczmarczyk K et al. (2017) [19] | Low                                                       | Low                                              | Low                                     | Low                                               | Low                      | Low                             | Moderate                                 | Moderate |                            |
| Kim TS et al. (2019) [20]                  | Low                                                       | Low                                              | Low                                     | Low                                               | Low                      | Low                             | Low                                      | Low      |                            |
| Park JH et al. (2019) [21]                 | Low                                                       | Low                                              | Low                                     | Low                                               | Low                      | Low                             | Low                                      | Low      |                            |
| Yasuda K et al. (2000) [22]                | Low                                                       | Low                                              | Low                                     | Low                                               | Low                      | Low                             | Low                                      | Low      |                            |
| Mita T et al. (2001) [23]                  | Low                                                       | Low                                              | Low                                     | Low                                               | Low                      | Low                             | Low                                      | Low      |                            |
| Sekiguchi M et al. (2013) [24]             | Low                                                       | Moderate                                         | Low                                     | Low                                               | Low                      | Low                             | Moderate                                 | Moderate |                            |
| Yamada T et al. (2014) [25]                | Low                                                       | Low                                              | Low                                     | Low                                               | Low                      | Low                             | Moderate                                 | Moderate |                            |
| Sekiguchi M et al. (2015) [26]             | Low                                                       | Moderate                                         | Low                                     | Low                                               | Low                      | Low                             | Moderate                                 | Moderate |                            |

|                            |     |          |     |     |     |          |          |          |
|----------------------------|-----|----------|-----|-----|-----|----------|----------|----------|
| Huang Q et al. (2015) [27] | Low | Low      | Low | Low | Low | Moderate | Moderate | Moderate |
| Fang C et al. (2016) [28]  | Low | Low      | Low | Low | Low | Low      | Low      | Low      |
| Lee HJ et al. (2017) [29]  | Low | Low      | Low | Low | Low | Low      | Low      | Low      |
| Park JW et al. (2017) [30] | Low | Moderate | Low | Low | Low | Low      | Moderate | Moderate |
| Yu H et al. (2017) [10]    | Low | Low      | Low | Low | Low | Low      | Low      | Low      |
| Min BH et al. (2018) [31]  | Low | Low      | Low | Low | Low | Low      | Low      | Low      |
